# Supplementary material for: Reduced graphene oxide supported AgxNi100−x alloy nanoparticles: a highly active and reusable catalyst for the reduction of nitroarenes
Source: Royal Society of Chemistry journal article supplement (doi:10.1039/c5ta03779d), 2015-01-01
Supplement: c5ta03779d1.pdf [file c5ta03779d1.pdf]

## SUPPORTING INFORMATION

### Reduced graphene oxide supported $\text{Ag}_x\text{Ni}_{100-x}$ alloy nanoparticles: A highly active and reusable catalyst for the reduction of nitroarenes

Ritu Dhanda, Mazaahir Kidwai\*

Green chemistry research laboratory, Department of Chemistry, University of Delhi, North campus, New Delhi-110007, India

\*E-mail: [kidwai.chemistry@gmail.com](mailto:kidwai.chemistry@gmail.com), FAX: (91-11) 27666235

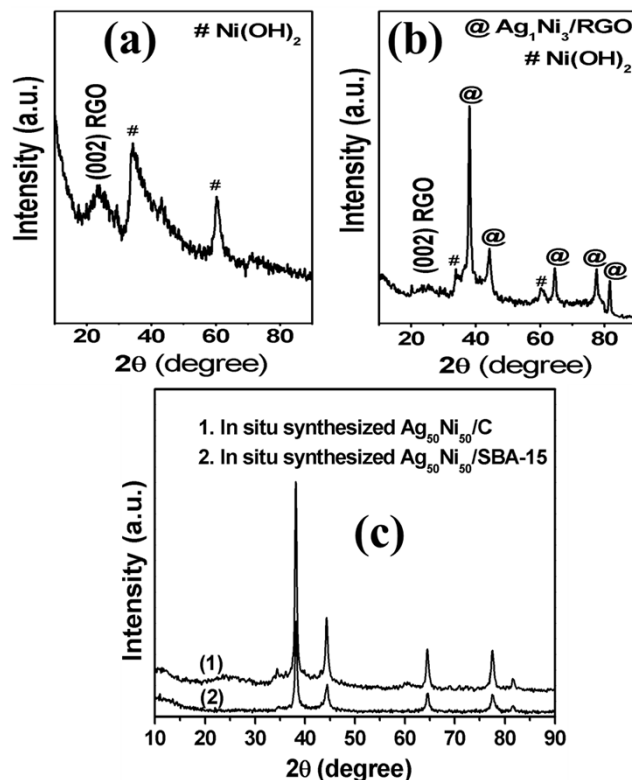

**Figure S1.** XRD spectrum of (a) pure Ni/RGO, (b)  $\text{Ag}_{25}\text{Ni}_{75}/\text{RGO}$ , (c) in situ  $\text{Ag}_{50}\text{Ni}_{50}/\text{C}$  and in situ  $\text{Ag}_{50}\text{Ni}_{50}/\text{SBA-15}$  nanocomposite samples.

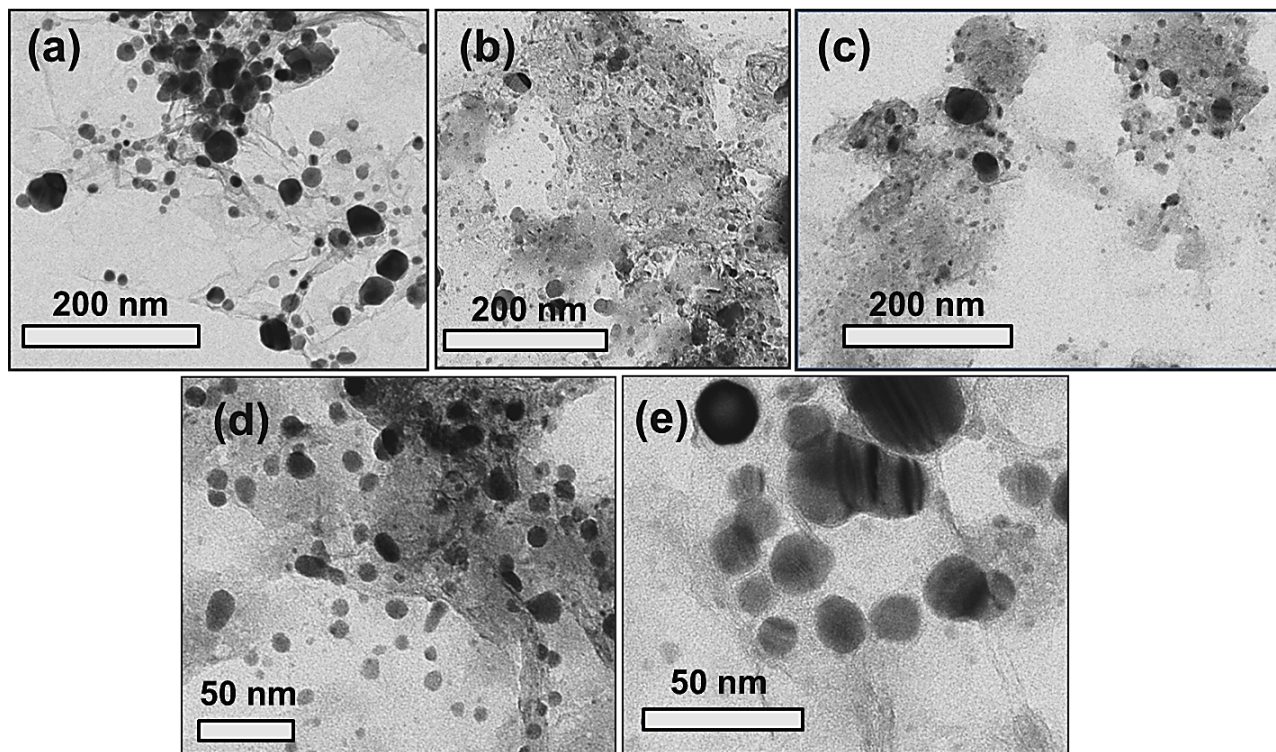

**Figure S2.** Low resolution TEM images for (a) Ag/RGO, (b) Ag<sub>75</sub>Ni<sub>25</sub>/RGO, (c,d) Ag<sub>50</sub>Ni<sub>50</sub>/RGO and (e) Ag<sub>25</sub>Ni<sub>75</sub>/RGO samples.

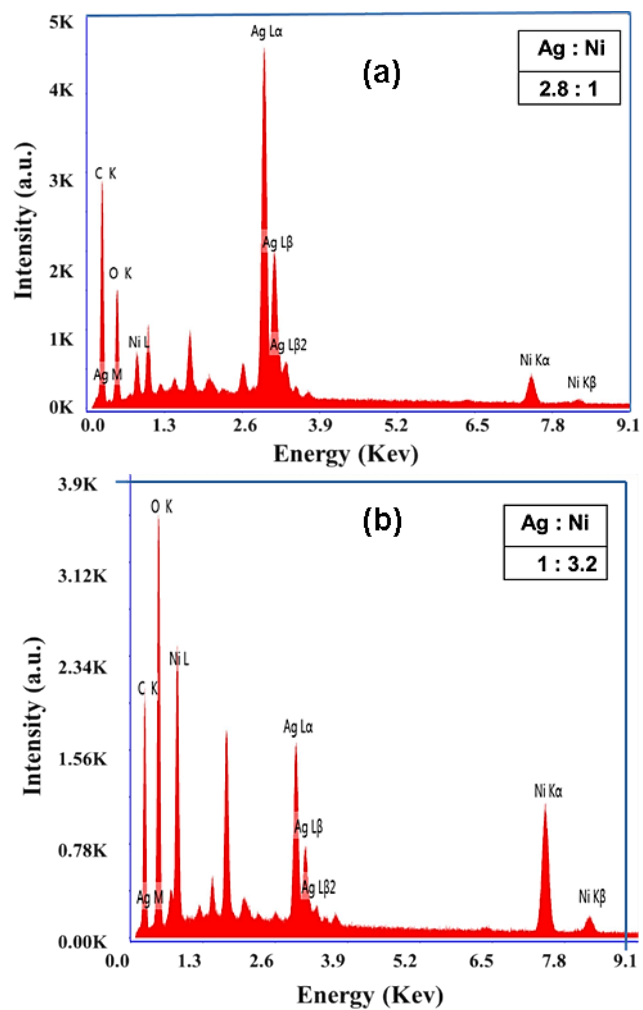

**Figure S3.** EDS analysis of (a) Ag<sub>75</sub>Ni<sub>25</sub>/RGO, (b) Ag<sub>25</sub>Ni<sub>75</sub>/RGO samples.

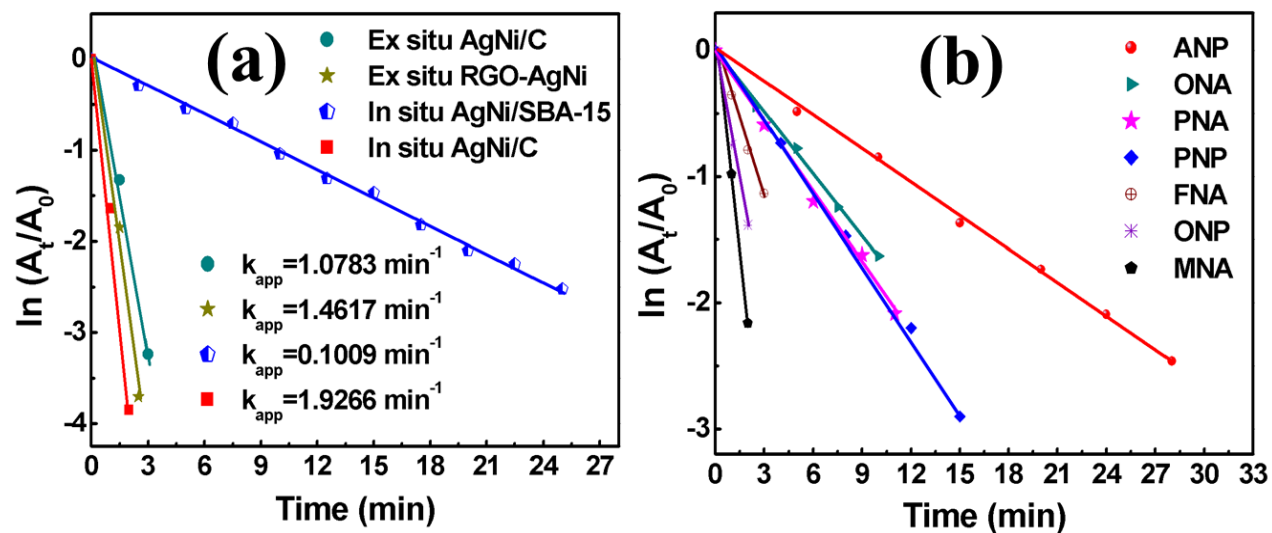

**Figure S4.** Plots of  $\ln(A_t/A_0)$  versus time for rate constant calculation of (a) in situ AgNi/C, ex situ AgNi/RGO, ex situ AgNi/C, in situ AgNi/SBA-15 nanocomposite samples (b) tandem reduction reactions of nitro compounds with AB using highest active in situ synthesized  $\text{Ag}_{50}\text{Ni}_{50}/\text{RGO}$  nanocomposites.

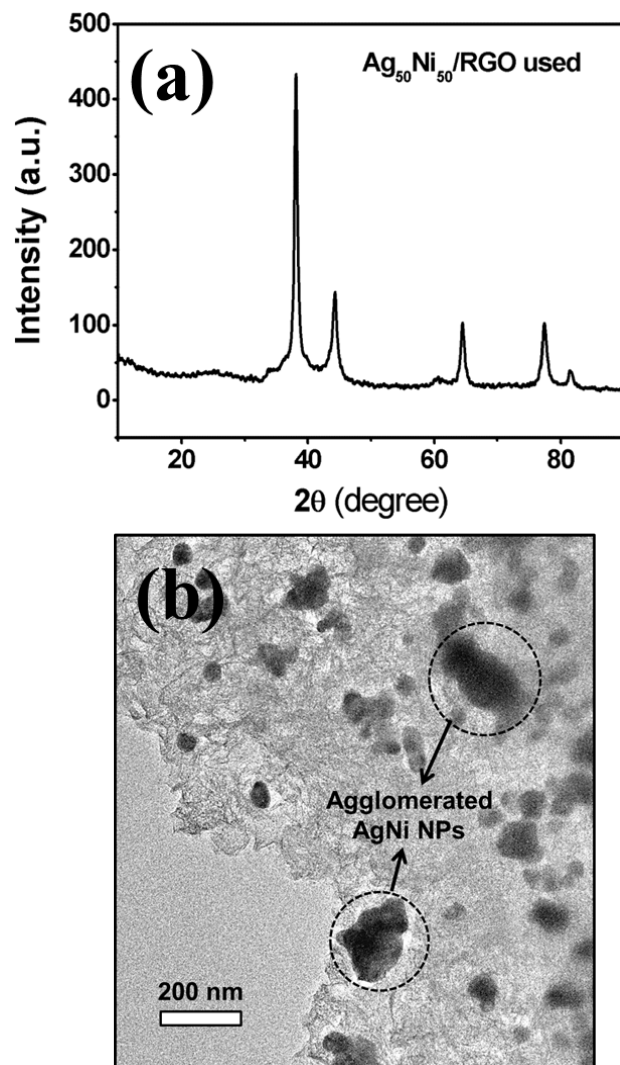

**Figure S5.** (a) XRD spectrum and (b) low resolution TEM image of  $\text{Ag}_{50}\text{Ni}_{50}/\text{RGO}$  sample after four cycle.

**Table 1.** Comparison of apparent rate constant and activity parameter of some recent nano-catalysts with present work for reduction of 4-NP by NaBH<sub>4</sub>.

| Catalyst                                                 | Type                  | Amount of Catalyst (mg) | Apparent rate Constant $K_{app} = \times 10^{-3} s^{-1}$ | Activity Parameter $K = s^{-1}g^{-1}$ | Reference    |
|----------------------------------------------------------|-----------------------|-------------------------|----------------------------------------------------------|---------------------------------------|--------------|
| Ni/Ag                                                    | Core-shell            | 0.5                     | 2.16                                                     | 4.33                                  | 19           |
| Ag <sub>0.6</sub> Ni <sub>0.4</sub>                      | MTNPs                 | 0.2                     | 32.2                                                     | 161                                   | 29           |
| RGO-Ni <sub>25</sub> Co <sub>75</sub>                    | Nanocomposite         | 6                       | 93.22                                                    | 15.53                                 | 34           |
| RGO-ZnNi <sub>5</sub> -2                                 | Nanocomposite         | 5                       | 3.92                                                     | 0.785                                 | 37           |
| Pd-Ag                                                    | Dendrites             | 1                       | 39.1                                                     | 39.1                                  | 38           |
| Au <sub>0.1</sub> Ag <sub>0.9</sub>                      | Nanowire              | 0.25                    | 3.8                                                      | 15.2                                  | 39           |
| Au-Fe <sub>3</sub> O <sub>4</sub>                        | Supported             | 2                       | 6.33                                                     | 3.165                                 | 40           |
| Fe <sub>3</sub> O <sub>4</sub> @SiO <sub>2</sub> -LBL-Au | Composite microsphere | 0.03                    | 56.6                                                     | 188.8                                 | 41           |
| Pt <sub>55</sub> Pd <sub>38</sub> Bi <sub>7</sub>        | Nanowires             | 0.015                   | 4.3                                                      | 286.6                                 | 42           |
| Pt <sub>50</sub> Au <sub>50</sub> /CeO <sub>2</sub>      | Nanotube              | 50                      | 108.7                                                    | 2.174                                 | 43           |
| Ag <sub>50</sub> Ni <sub>50</sub> /RGO                   | Nanocomposite         | 0.02                    | 48.40                                                    | 968                                   | Present work |
